# Supplementary material
Source: PubMed Central journal article supplement (PMC8054885)
Supplement: ASN.2020040517SupplementaryData.pdf [file ASN.2020040517SupplementaryData.pdf]

## **Supplemental material**

### **Long-term exposure to ambient PM<sub>2.5</sub> and increased risk of chronic kidney disease prevalence in China**

Guoxing Li, Jing Huang, Jinwei Wang, Minghui Zhao, Yang Liu, Xinbiao Guo,

Shaowei Wu, Luxia Zhang

**Supplemental Table 1.** The percentage of study participants in each PM<sub>2.5</sub> level in China between 2007 and 2010.

**Supplemental Table 2.** Within-city effects and between-city effects of ambient PM<sub>2.5</sub> exposure with CKD and albuminuria in China between 2007 and 2010.

**Supplemental Table 3.** Estimated effects of an increase of 10 µg/m<sup>3</sup> in 2-year mean PM<sub>2.5</sub> exposure on CKD and albuminuria in China between 2007 and 2010 when controlling for different potential confounders.

**Supplemental Table 4.** Estimated effects of an increase of 10 µg/m<sup>3</sup> increase in 1-year mean PM<sub>2.5</sub> exposure on CKD and albuminuria in China between 2007 and 2010.

**Supplemental Table 5.** The associations between 1-year mean PM<sub>2.5</sub> exposure on CKD and albuminuria in participants with different characteristics in China between 2007 and 2010.

**Supplemental Figure 1.** CONSORT diagram of study participants recruitment in the analysis.

**Supplemental Figure 2.** Distribution of the study sites in both urban and rural areas.

Note: Triangle indicates the urban sites, and circular indicates the rural sites

**Supplemental Figure 3.** Exposure-response curves of 1-year mean PM<sub>2.5</sub> exposure with the prevalence of chronic kidney disease and albuminuria in China between 2007 and 2010 Note: (A) Chronic kidney disease (B) Albuminuria

**Supplemental Table 1.** The percentage of study participants in each PM<sub>2.5</sub> level in China between 2007 and 2010.

|                                                            | PM <sub>2.5</sub> concentration percentage (2-year mean) |           |           |           |           |           |
|------------------------------------------------------------|----------------------------------------------------------|-----------|-----------|-----------|-----------|-----------|
|                                                            | 0%-10%                                                   | 11%-25%   | 26%-50%   | 51%-75%   | 76%-90%   | 91%-100%  |
| PM <sub>2.5</sub> concentration range (µg/m <sup>3</sup> ) | 31.3-36.3                                                | 36.4-45.5 | 45.6-57.4 | 57.5-69.6 | 69.7-78.1 | 78.2-87.5 |
| Percentage of study participants                           | 11.7%                                                    | 15.2%     | 23.2%     | 25.6%     | 14.6%     | 9.6%      |

Note: PM<sub>2.5</sub> exposure level was calculated as the 2-year mean concentration.

**Supplemental Table 2.** Within-city effects and between-city effects of ambient PM<sub>2.5</sub> exposure with CKD and albuminuria in China between 2007 and 2010.

| Effects                          | CKD    |                  |                 | albuminuria |                  |                 |
|----------------------------------|--------|------------------|-----------------|-------------|------------------|-----------------|
|                                  | N      | OR (95% CI)      | <i>p</i> -value | N           | OR (95% CI)      | <i>p</i> -value |
| Within-city Effect <sup>a</sup>  | 47,204 | 1.28(1.22, 1.35) | <0.001          | 47,204      | 1.39(1.32, 1.47) | <0.001          |
| Between-city Effect <sup>a</sup> | 47,024 | 0.51(0.18, 1.46) | 0.212           | 47,204      | 0.57(0.18, 1.83) | 0.347           |
| Within-city Effect <sup>b</sup>  | 47,024 | 1.30(1.23, 1.36) | <0.001          | 47,024      | 1.41(1.33, 1.49) | <0.001          |
| Between-city Effect <sup>b</sup> | 47,024 | 0.41(0.14, 1.18) | 0.097           | 47,024      | 0.40(0.13, 1.29) | 0.126           |

Abbreviation: CKD, chronic kidney disease.

<sup>a</sup> Model 1: Age, gender, education, family income, rural/urban area were adjusted in the model.

<sup>b</sup> Model 2: model 1 plus health-related factors including body mass index, smoking, alcohol consumption, history of cardiovascular diseases, status of diabetes mellitus and hypertension, and nephrotoxic medications were adjusted in the model.

Note: PM<sub>2.5</sub> exposure level was calculated as the 2-year mean concentration.

**Supplemental Table 3.** Estimated effects of an increase of 10  $\mu\text{g}/\text{m}^3$  in 2-year mean  $\text{PM}_{2.5}$  exposure on CKD and albuminuria in China between 2007 and 2010 when controlling for different potential confounders.

| Models               | CKD    |                   |                 | Albuminuria |                   |                 |
|----------------------|--------|-------------------|-----------------|-------------|-------------------|-----------------|
|                      | N      | OR (95% CI)       | <i>p</i> -value | N           | OR (95% CI)       | <i>p</i> -value |
| Model 1 <sup>a</sup> | 47,204 | 1.28 (1.22, 1.35) | <0.001          | 47,204      | 1.39 (1.32, 1.47) | <0.001          |
| Model 2 <sup>b</sup> | 47,204 | 1.29 (1.23, 1.26) | <0.001          | 47,204      | 1.40 (1.32, 1.48) | <0.001          |
| Model 3 <sup>c</sup> | 47,204 | 1.30 (1.24, 1.37) | <0.001          | 47,204      | 1.41(1.33, 1.49)  | <0.001          |

Abbreviation: CKD, chronic kidney disease.

<sup>a</sup> Model 1: Age, gender, education, family income, and urban/rural area were adjusted in the model.

<sup>b</sup> Model 2: Model 1 plus health-related factors, including body mass index, smoking history, alcohol consumption, history of cardiovascular disease, diabetes mellitus and hypertension, and nephrotoxic medications, were adjusted in the model.

<sup>c</sup> Model 3: Model 2 plus medical insurance status (yes or no), were adjusted in the model.

**Supplemental Table 4.** Estimated effects of an increase of 10  $\mu\text{g}/\text{m}^3$  increase in 1-year mean  $\text{PM}_{2.5}$  exposure on CKD and albuminuria in China between 2007 and 2010.

| Models               | CKD    |                  |                 | Albuminuria |                  |                 |
|----------------------|--------|------------------|-----------------|-------------|------------------|-----------------|
|                      | N      | OR (95%CI)       | <i>p</i> -value | N           | OR (95%CI)       | <i>p</i> -value |
| Model 1 <sup>a</sup> | 47,204 | 1.26(1.21, 1.32) | <0.001          | 47,204      | 1.36(1.30, 1.44) | <0.001          |
| Model 2 <sup>b</sup> | 47,204 | 1.28(1.22, 1.34) | <0.001          | 47,204      | 1.37(1.30, 1.45) | <0.001          |

Abbreviation: CKD, chronic kidney disease.

<sup>a</sup> Model 1: Age, education, family income, urban/rural area were adjusted in the model.

<sup>b</sup> Model 2: model 1 plus health-related factors including body mass index, smoking, alcohol consumption, history of cardiovascular diseases, status of diabetes and hypertension were adjusted in the model.

**Supplemental Table 5.** The associations between 1-year mean PM<sub>2.5</sub> exposure on CKD and albuminuria in participants with different characteristics in China between 2007 and 2010.

| Stratified characteristic         | Number of eligible participants | CKD               |                             | Albuminuria       |                             |
|-----------------------------------|---------------------------------|-------------------|-----------------------------|-------------------|-----------------------------|
|                                   |                                 | OR (95% CI)       | Interaction <i>P</i> -value | OR (95% CI)       | Interaction <i>P</i> -value |
| Region                            |                                 |                   |                             |                   |                             |
| Urban                             | 25,345                          | 1.26 (1.21, 1.33) | 0.004                       | 1.35 (1.29, 1.43) | 0.003                       |
| Rural                             | 21,859                          | 1.19 (1.10, 1.29) |                             | 1.27 (1.16, 1.38) |                             |
| Gender                            |                                 |                   |                             |                   |                             |
| Male                              | 20,148                          | 1.32 (1.25, 1.39) | 0.003                       | 1.43 (1.35, 1.51) | 0.001                       |
| Female                            | 27,056                          | 1.25 (1.19, 1.31) |                             | 1.34 (1.27, 1.41) |                             |
| Age                               |                                 |                   |                             |                   |                             |
| ≥65 years                         | 7,915                           | 1.17 (1.11, 1.24) | <0.001                      | 1.24 (1.17, 1.33) | <0.001                      |
| <65 years                         | 39,289                          | 1.31 (1.25, 1.38) |                             | 1.42 (1.34, 1.49) |                             |
| BMI                               |                                 |                   |                             |                   |                             |
| ≥25 kg/m <sup>2</sup>             | 16,453                          | 1.27 (1.20, 1.33) | 0.389                       | 1.37 (1.29, 1.44) | 0.628                       |
| <25 kg/m <sup>2</sup>             | 30,418                          | 1.28 (1.22, 1.35) |                             | 1.38 (1.31, 1.46) |                             |
| Smoking                           |                                 |                   |                             |                   |                             |
| Non-current smoker                | 36,110                          | 1.31 (1.24, 1.39) | 0.098                       | 1.36 (1.29, 1.44) | 0.149                       |
| Current smoker                    | 11,094                          | 1.27 (1.21, 1.33) |                             | 1.41 (1.32, 1.50) |                             |
| Diabetes mellitus                 |                                 |                   |                             |                   |                             |
| No                                | 43,671                          | 1.29 (1.23, 1.36) | 0.002                       | 1.41 (1.33, 1.49) | 0.069                       |
| Yes                               | 3,488                           | 1.19 (1.11, 1.27) |                             | 1.33 (1.24, 1.44) |                             |
| Hypertension                      |                                 |                   |                             |                   |                             |
| No                                | 30,357                          | 1.28 (1.22, 1.34) | 0.068                       | 1.40 (1.32, 1.47) | 0.037                       |
| Yes                               | 16,604                          | 1.23 (1.16, 1.31) |                             | 1.34 (1.27, 1.42) |                             |
| History of cardiovascular disease |                                 |                   |                             |                   |                             |

|     |        |                   |       |                   |       |
|-----|--------|-------------------|-------|-------------------|-------|
| No  | 41,114 | 1.30 (1.23, 1.36) | 0.025 | 1.38 (1.31, 1.45) | 0.003 |
| Yes | 1,220  | 1.23 (1.16, 1.32) |       | 1.28 (1.20, 1.38) |       |

---

Abbreviations: CKD, chronic kidney disease; BMI, body mass index.

Model 2 adjustment (as illustrated in Supplemental Table 4 footnote) was used for the stratified analyses. The analysis was performed for an increase of 10  $\mu\text{g}/\text{m}^3$  in  $\text{PM}_{2.5}$ .

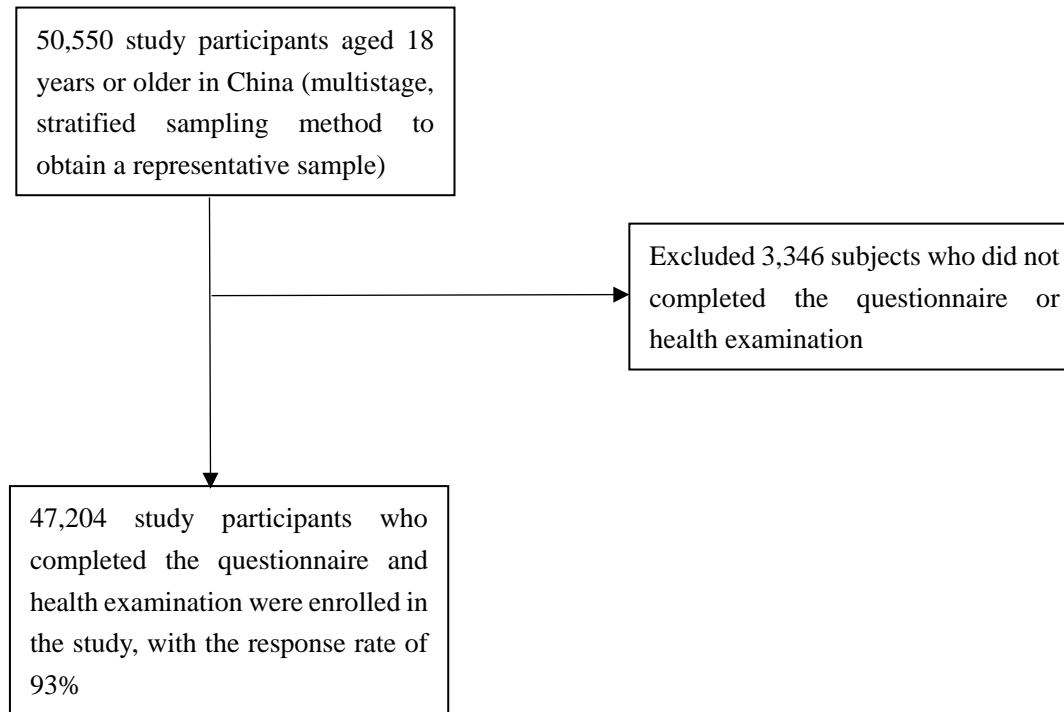

**Supplemental Figure 1.** CONSORT diagram of study participants recruitment in the analysis.

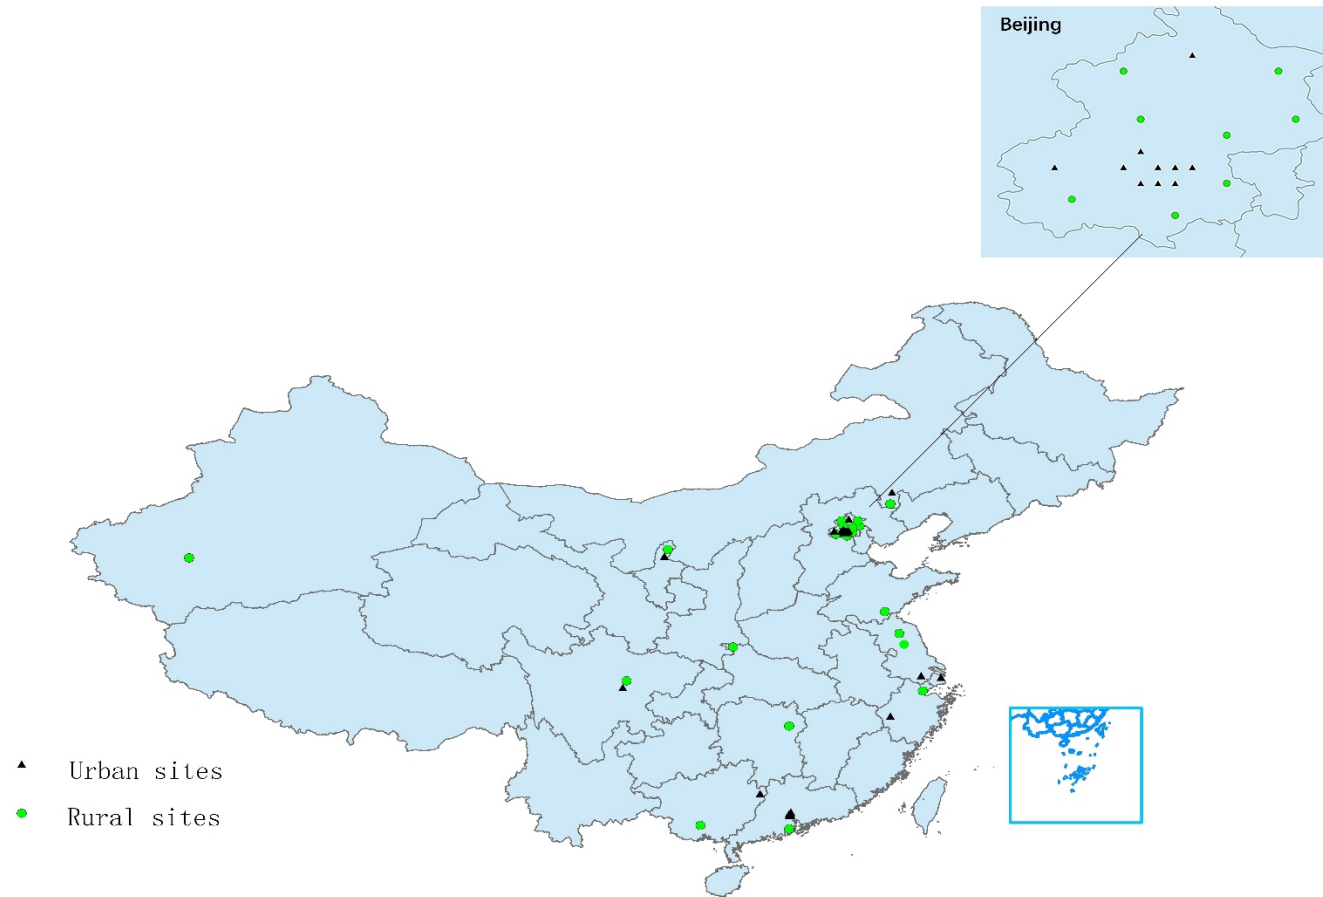

**Supplemental Figure 2.** Distribution of the study sites in both urban and rural areas. Note: Triangle indicates the urban sites, and circular indicates the rural sites

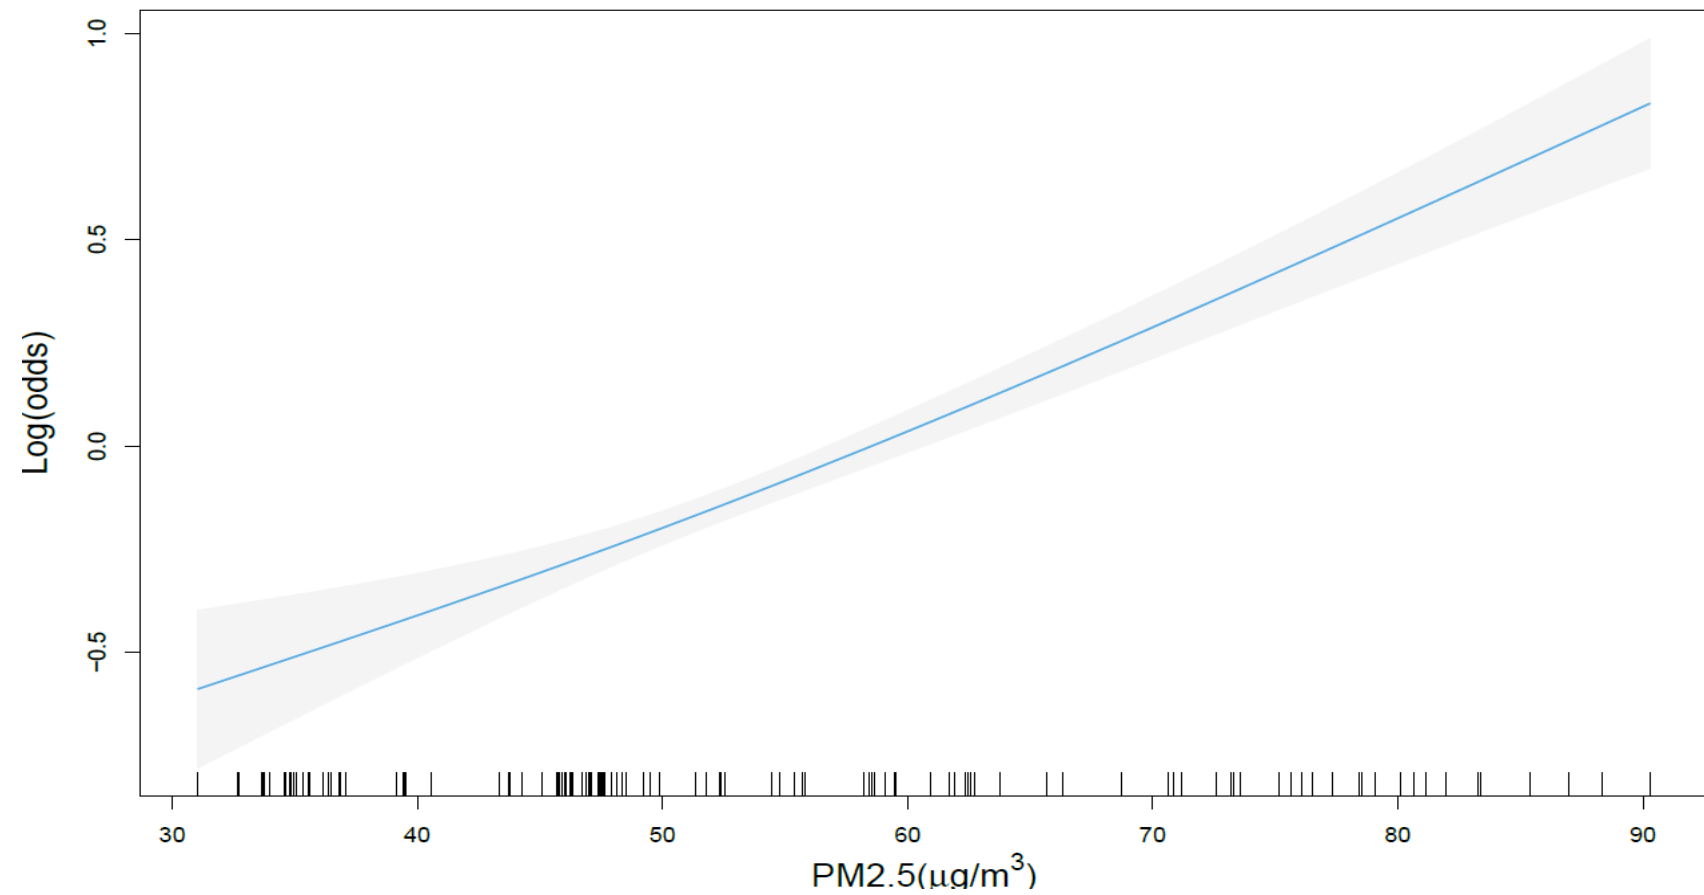

**Supplemental Figure 3 (A).** Exposure-response curve of 1-year mean PM<sub>2.5</sub> exposure with the prevalence of chronic kidney disease in China between 2007 and 2010.

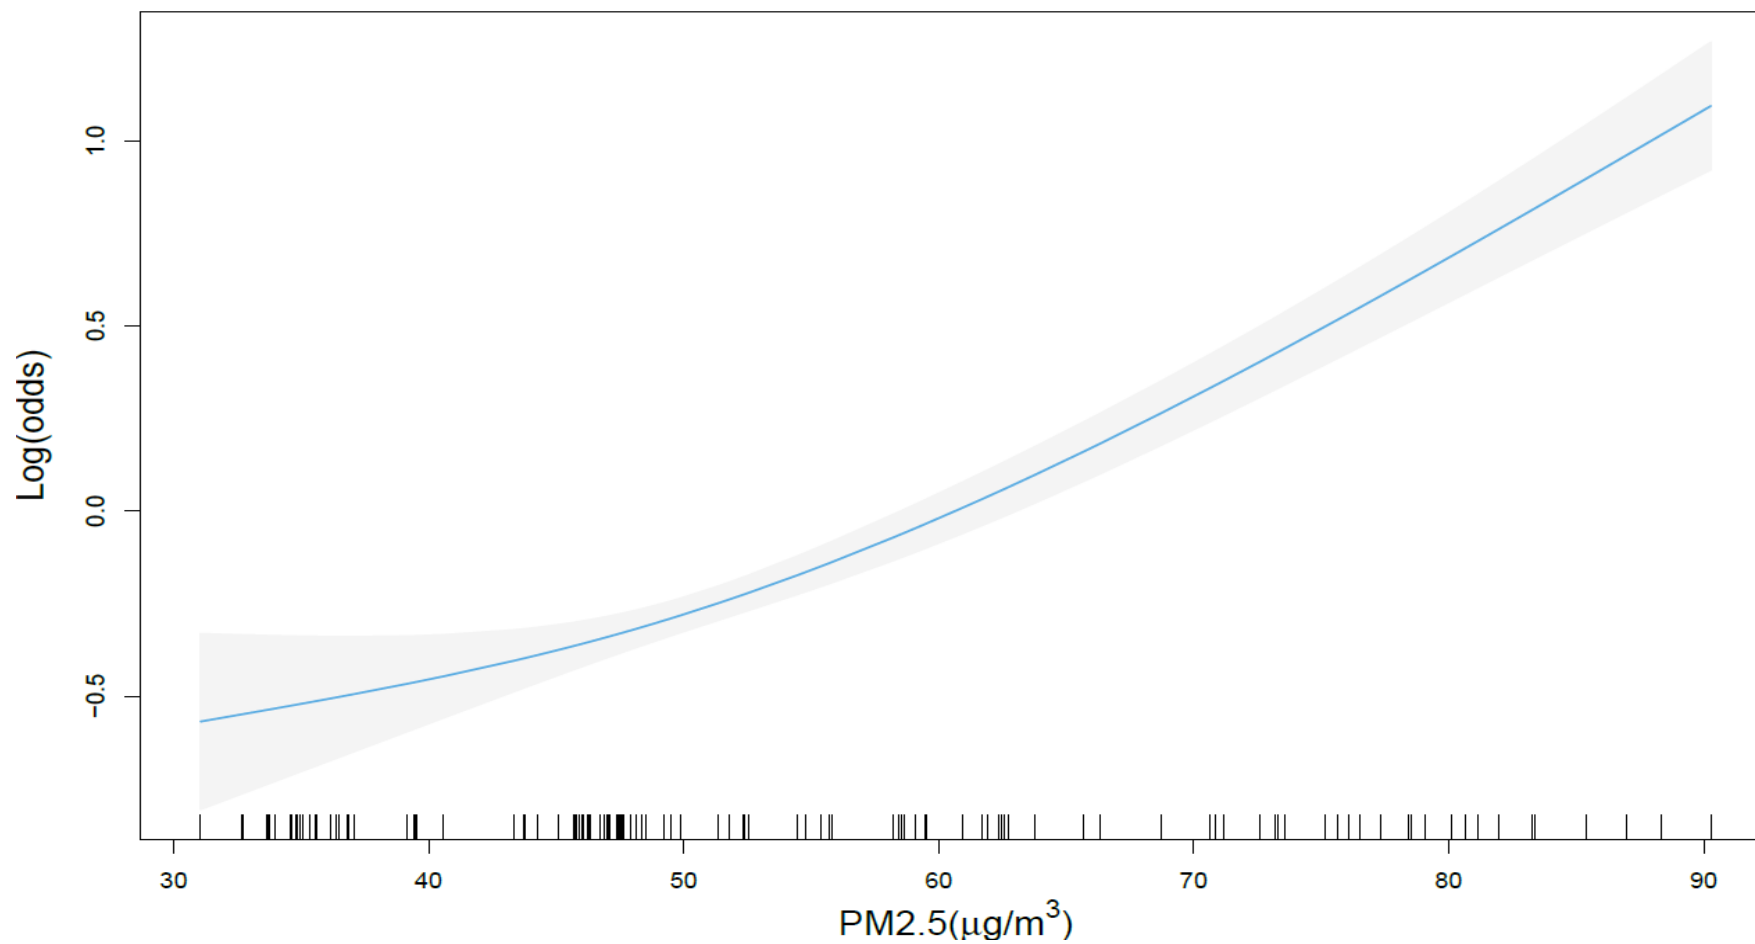

**Supplemental Figure 3(B).** Exposure-response curve of 1-year mean PM<sub>2.5</sub> exposure with albuminuria in China between 2007 and 2010.
